# Supplementary material for: Improving Access to Surgery Through Surgical Team Mentoring – Policy Lessons From Group Model Building With Local Stakeholders in Malawi
Source: PubMed Central journal article supplement (PMC9808242; doi:10.34172/ijhpm.2021.78), 2021-08-03

**Article title:** Improving Access to Surgery Through Surgical Team Mentoring – Policy Lessons From Group Model Building With Local Stakeholders in Malawi

**Journal name:** International Journal of Health Policy and Management (IJHPM)

**Authors' information:** Henk Broekhuizen<sup>1,2</sup>, Martilord Ifeanyi<sup>1</sup>, Gerald Mwapasa<sup>3</sup>, Chiara Pittalis<sup>4</sup>, Patrick Noah<sup>3</sup>, Nyengo Mkandawire<sup>3</sup>, Eric Borgstein<sup>3</sup>, Ruairí Brugha<sup>5</sup>, Jakub Gajewski<sup>4</sup>, Leon Bijlmakers<sup>1\*</sup>

<sup>1</sup>Radboud Institute for Health Sciences, Radboud University Medical Centre, Nijmegen, The Netherlands.

<sup>2</sup>Department of Health and Society, Wageningen University and Research, Wageningen, The Netherlands.

<sup>3</sup>College of Medicine, Blantyre, Malawi.

<sup>4</sup>Institute of Global Surgery, Royal College of Surgeons in Ireland, Dublin, Ireland.

<sup>5</sup>Department of Epidemiology and Public Health Medicine, Royal College of Surgeons in Ireland, Dublin, Ireland.

(\*Corresponding author: [Leon.Bijlmakers@radboudumc.nl](mailto:Leon.Bijlmakers@radboudumc.nl))

**Supplementary file 5.** Sensitivity analysis of parameter effects on total mentoring costs (Figures A16-A20)

Figure A16: Impact of percentage\_avoided\_that\_conservative on total\_mentoring\_costs

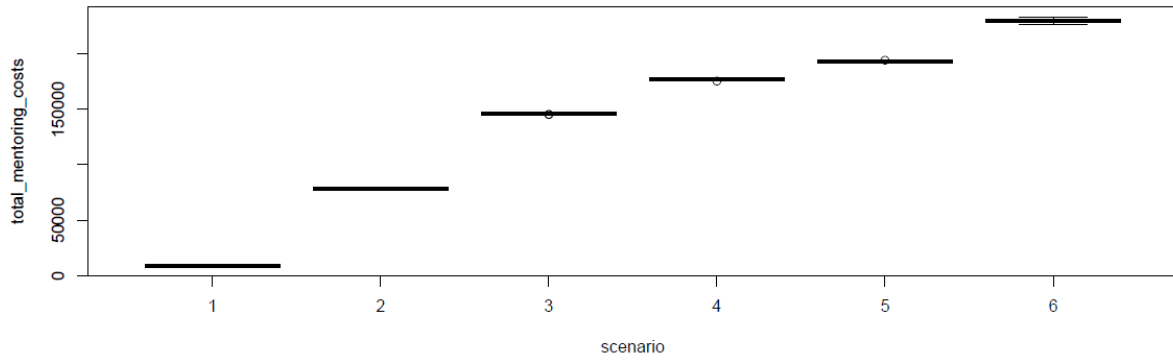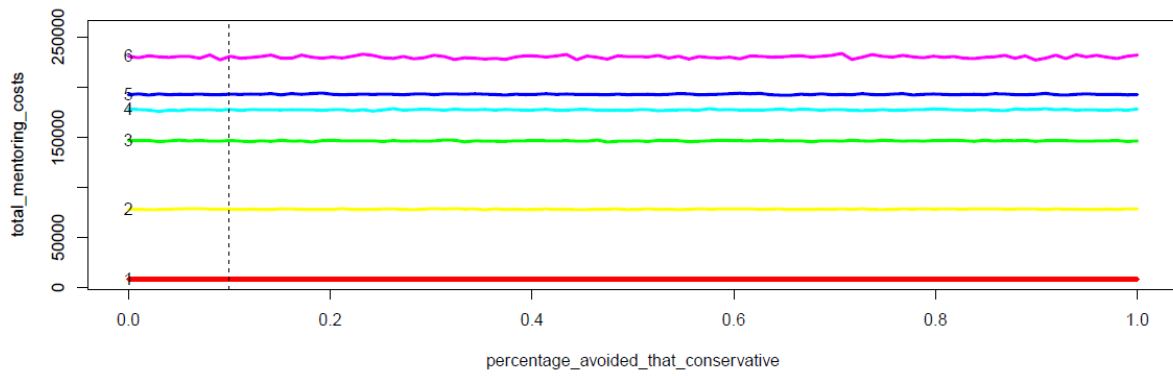

Figure A17: Impact of percentage\_costs\_ward on total\_mentoring\_costs

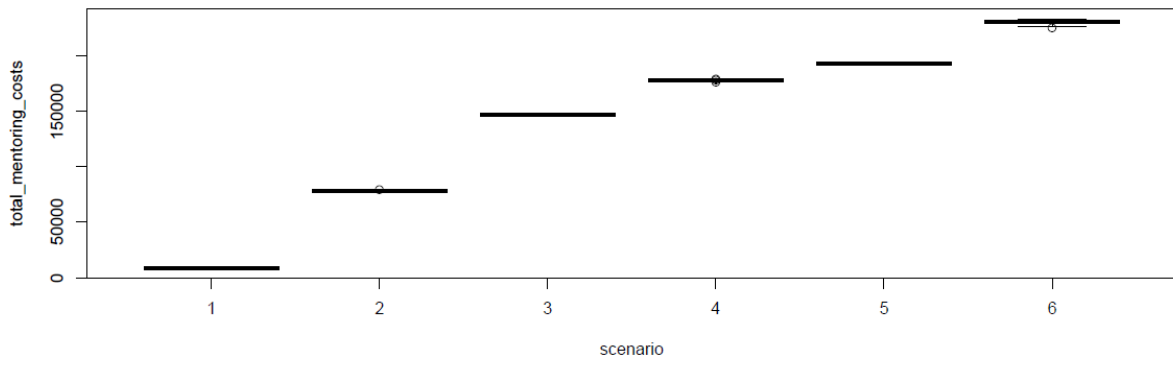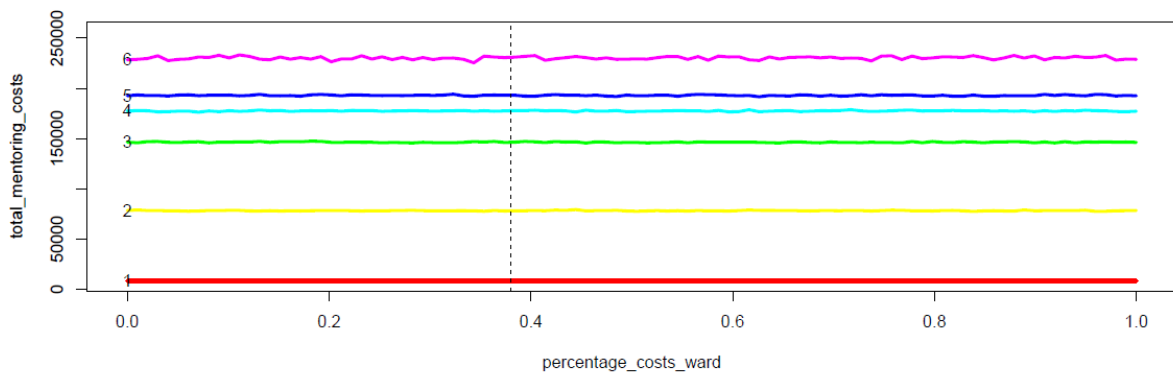

Figure A18: Impact of percentage\_avoided\_operated\_locally on total\_mentoring\_costs

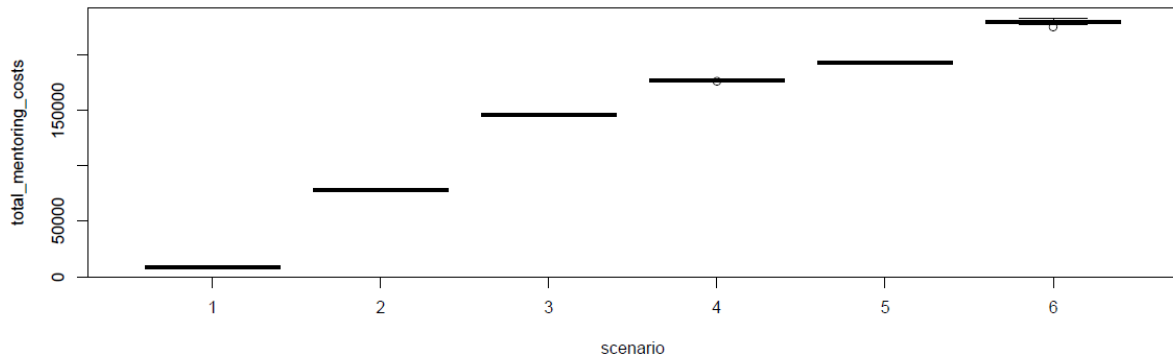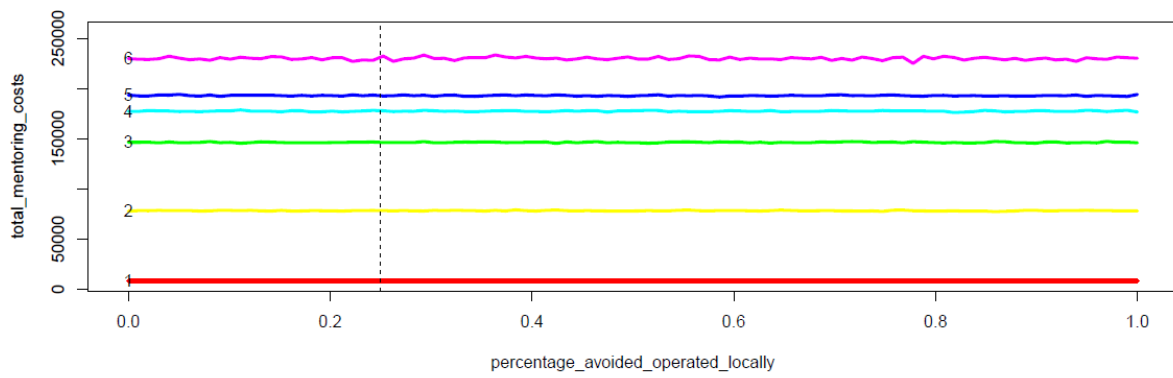

Figure A19: Impact of percentage\_referrals\_surgical on total\_mentoring\_costs

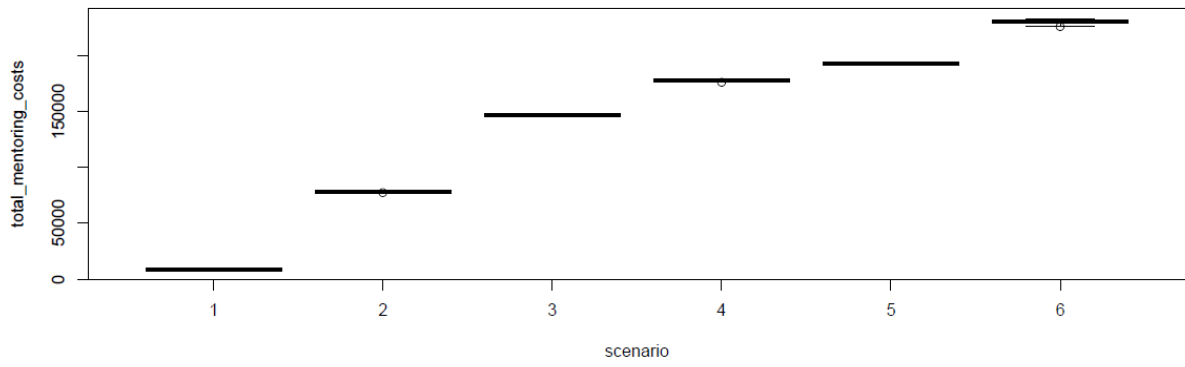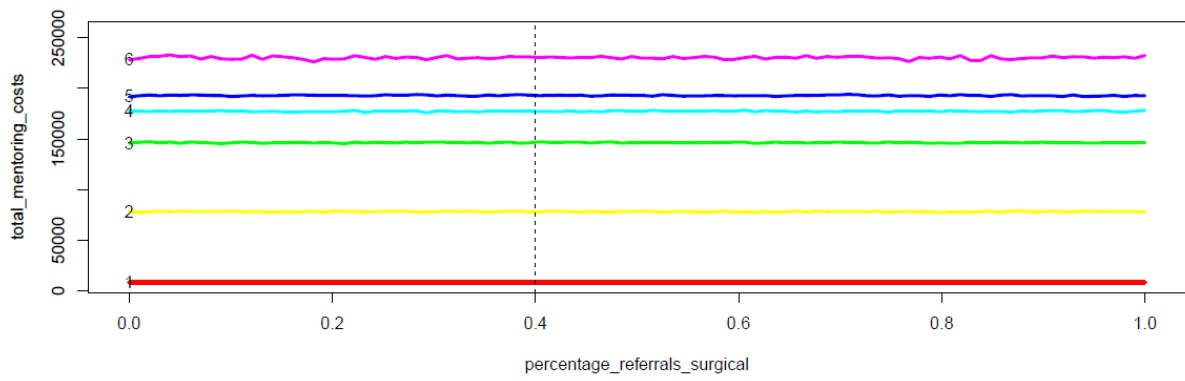

Figure A20: Impact of effectiveness\_constant on total\_mentoring\_costs

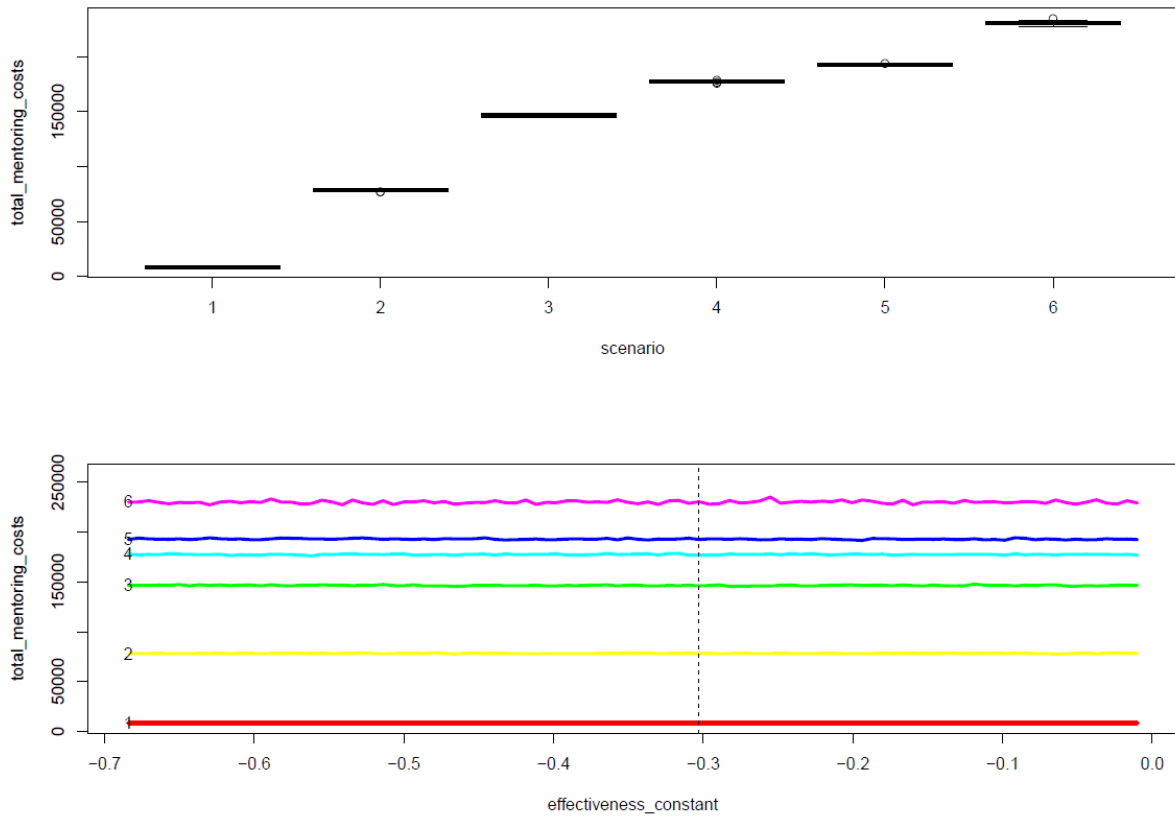

Supplement: ijhpm-11-1744-s005.pdf [file ijhpm-11-1744-s005.pdf]
