# Supplementary material for: Improving Access to Surgery Through Surgical Team Mentoring – Policy Lessons From Group Model Building With Local Stakeholders in Malawi
Source: PubMed Central journal article supplement (PMC9808242; doi:10.34172/ijhpm.2021.78), 2021-08-03
Supplement: ijhpm-11-1744-s001.pdf [file ijhpm-11-1744-s001.pdf]

**Article title:** Improving Access to Surgery Through Surgical Team Mentoring – Policy Lessons From Group Model Building With Local Stakeholders in Malawi

**Journal name:** International Journal of Health Policy and Management (IJHPM)

**Authors' information:** Henk Broekhuizen<sup>1,2</sup>, Martilord Ifeanyichi<sup>1</sup>, Gerald Mwapasa<sup>3</sup>, Chiara Pittalis<sup>4</sup>, Patrick Noah<sup>3</sup>, Nyengo Mkandawire<sup>3</sup>, Eric Borgstein<sup>3</sup>, Ruairí Brughá<sup>5</sup>, Jakub Gajewski<sup>4</sup>, Leon Bijlmakers<sup>1\*</sup>

<sup>1</sup>Radboud Institute for Health Sciences, Radboud University Medical Centre, Nijmegen, The Netherlands.

<sup>2</sup>Department of Health and Society, Wageningen University and Research, Wageningen, The Netherlands.

<sup>3</sup>College of Medicine, Blantyre, Malawi.

<sup>4</sup>Institute of Global Surgery, Royal College of Surgeons in Ireland, Dublin, Ireland.

<sup>5</sup>Department of Epidemiology and Public Health Medicine, Royal College of Surgeons in Ireland, Dublin, Ireland.

(\*Corresponding author: [Leon.Bijlmakers@radboudumc.nl](mailto:Leon.Bijlmakers@radboudumc.nl))

**Supplementary file 1.** List of 23 government-owned district hospitals

Source data used in resource requirement calculations. Single asterisks (\*) denote empirical data from SURG-Africa; double asterisks (\*\*) denote values from literature; other values were imputed using (log)linear regression models.

DH=district hospital, C=Central region, N=Northern region, S=Southern region,  
QECH=Queen Elizabeth Central Hospital, MWK=Malawian Kwacha

|                   |        |                        |                |                       | Cost per ...           |                     |                          | Referring patients to ... |           |      |          |
|-------------------|--------|------------------------|----------------|-----------------------|------------------------|---------------------|--------------------------|---------------------------|-----------|------|----------|
| District hospital | Region | Weighted distance (km) | Referrals 2018 | District population** | Mentor trip (1000 MWK) | Referral (1000 MWK) | Major surgery (1000 MWK) | Mzuzu CH                  | Kamuzu CH | QECH | Zomba CH |
| Bwaila            | C      | 4                      | 171**          | 989,318               | 341                    | 10                  | 184                      | -                         | 100%      | -    | -        |
| Dedza             | C      | 90                     | 114**          | 830,512               | 616                    | 35                  | 184                      | -                         | 100%      | -    | -        |
| Dowa              | C      | 52                     | 794**          | 772,569               | 495                    | 20                  | 184                      | -                         | 100%      | -    | -        |
| Kasungu           | C      | 129                    | 120**          | 842,953               | 741                    | 61                  | 184                      | -                         | 100%      | -    | -        |
| Mchinji           | C      | 114                    | 86**           | 602,305               | 693                    | 49                  | 184                      | -                         | 100%      | -    | -        |
| Nkhokota          | C      | 197                    | 257**          | 395,897               | 958                    | 164                 | 184                      | -                         | 100%      | -    | -        |
| Ntcheu            | C      | 160                    | 129**          | 659,608               | 840                    | 96                  | 184                      | -                         | 100%      | -    | -        |
| Ntchisi           | C      | 96                     | 544**          | 317,069               | 635                    | 38                  | 184                      | -                         | 100%      | -    | -        |
| Salima            | C      | 102                    | 193**          | 478,346               | 655                    | 42                  | 184                      | -                         | 100%      | -    | -        |
| Chitipa           | N      | 310                    | 86             | 234,927               | 1320                   | 841                 | 184                      | 100%                      | -         | -    | -        |
| Karonga           | N      | 218                    | 86             | 365,028               | 1026                   | 222                 | 184                      | 100%                      | -         | -    | -        |
| Mzimba            | N      | 116                    | 103            | 936,250               | 699                    | 51                  | 184                      | 100%                      | -         | -    | -        |
| Nkhata Bay        | N      | 53                     | 616            | 285,795               | 498                    | 20                  | 184                      | 100%                      | -         | -    | -        |
| Rumphi            | N      | 66                     | 574            | 229,161               | 539                    | 25                  | 184                      | 100%                      | -         | -    | -        |
| Mangochi          | S      | 143                    | 229*           | 1,148,611             | 786*                   | 75                  | 83**                     | -                         | -         | 25%  | 75%      |
| Mulanje           | S      | 64                     | 355*           | 684,107               | 533*                   | 24*                 | 125**                    | -                         | -         | 100% | -        |
| Nsanje            | S      | 220                    | 286*           | 299,168               | 1032*                  | 229*                | 314**                    | -                         | -         | 100% | -        |
| Chikwawa          | S      | 47                     | 416*           | 564,684               | 479*                   | 19                  | 184                      | -                         | -         | 100% | -        |
| Chiradzulu        | S      | 22                     | 342*           | 356,875               | 399*                   | 13                  | 184                      | -                         | -         | 100% | -        |
| Machinga          | S      | 69                     | 207*           | 735,438               | 549*                   | 26                  | 184                      | -                         | -         | 25%  | 75%      |
| Mwanza            | S      | 105                    | 166*           | 130,949               | 664*                   | 43*                 | 184                      | -                         | -         | 100% | -        |
| Phalombe          | S      | 92                     | 171*           | 429,450               | 623*                   | 36                  | 184                      | -                         | -         | 100% | -        |
| Thyolo            | S      | 40                     | 423*           | 721,456               | 456*                   | 17                  | 184                      | -                         | -         | 100% | -        |
